# Supplementary material for: Identifying Hosts of Families of Viruses: A Machine Learning Approach
Source: PubMed Central journal article supplement (PMC3235098; doi:10.1371/journal.pone.0027631), 2011-12-09
Supplement: pone.0027631.s004.pdf [file pone.0027631.s004.pdf]

Table S 2: List of viruses in *Rhabdoviridae* family used in learning.

| Identifier | Name                                               | Host   | Subfamily         |
|------------|----------------------------------------------------|--------|-------------------|
| NC_009609  | Orchid fleck virus RNA 2                           | Plant  | unassigned        |
| NC_006942  | Taro vein chlorosis virus                          | Plant  | Nucleorhabdovirus |
| NC_005975  | Maize mosaic virus                                 | Plant  | Nucleorhabdovirus |
| EF614258   | West Caucasian bat virus                           | Animal | Lyssavirus        |
| DQ186554   | Iranian maize mosaic nucleorhabdovirus             | Plant  | Nucleorhabdovirus |
| NC_007642  | Lettuce necrotic yellows virus                     | Plant  | Cytorhabdovirus   |
| EF687738   | Lettuce yellow mottle virus                        | Plant  | Cytorhabdovirus   |
| NC_002251  | Northern cereal mosaic virus                       | Plant  | Cytorhabdovirus   |
| NC_001615  | Sonchus yellow net virus                           | Plant  | Cytorhabdovirus   |
| NC_005974  | Maize fine streak virus                            | Plant  | Nucleorhabdovirus |
| NC_003746  | Rice yellow stunt virus                            | Plant  | Nucleorhabdovirus |
| DQ491000   | Spring viremia of carp virus isolate A2            | Animal | Vesiculovirus     |
| EU373657   | Cocal virus Indiana 2                              | Animal | Vesiculovirus     |
| AJ318079   | Spring Viremia of Carp                             | Animal | Vesiculovirus     |
| NC_002803  | Spring viremia of carp virus                       | Animal | Vesiculovirus     |
| AF104985   | Hirame rhabdovirus strain CA 9703                  | Animal | Novirhabdovirus   |
| NC_005093  | Hirame rhabdovirus                                 | Animal | Novirhabdovirus   |
| EU177782   | Spring viremia of carp virus isolate BJ0505-2      | Animal | Vesiculovirus     |
| EU373658   | Vesicular stomatitis Alagoas virus Indiana 3       | Animal | Vesiculovirus     |
| AJ810084   | Isfahan virus N gene                               | Animal | Vesiculovirus     |
| DQ097384   | Spring viremia of carp virus isolate A1            | Animal | Vesiculovirus     |
| NC_001652  | Infectious hematopoietic necrosis virus            | Animal | Novirhabdovirus   |
| X89213     | Infectious haematopoietic necrosis virus (IHNV)    | Animal | Novirhabdovirus   |
| NC_000855  | Viral hemorrhagic septicemia virus                 | Animal | Novirhabdovirus   |
| Y18263     | Viral hemorrhagic septicemia virus strain Fil3 RNA | Animal | Novirhabdovirus   |
| AY840978   | Tupaia rhabdovirus                                 | Animal | Dimarhabdovirus   |
| NC_007020  | Tupaia rhabdovirus                                 | Animal | Dimarhabdovirus   |
| NC_008514  | Siniperca chuatsi rhabdovirus                      | Animal | Dimarhabdovirus   |
| DQ399789   | Siniperca chuatsi rhabdovirus from China           | Animal | Dimarhabdovirus   |
| AF147498   | Snakehead rhabdovirus                              | Animal | Novirhabdovirus   |
| NC_000903  | Snakehead rhabdovirus                              | Animal | Novirhabdovirus   |
| AF081020   | Australian bat lyssavirus                          | Animal | Lyssavirus        |
| EF614261   | Khujand lyssavirus                                 | Animal | Lyssavirus        |
| EF614259   | Aravan virus                                       | Animal | Lyssavirus        |
| AF418014   | Australian bat lyssavirus                          | Animal | Lyssavirus        |
| EU293116   | Rabies virus isolate 9704ARG                       | Animal | Lyssavirus        |
| EU293115   | Rabies virus isolate 9147FRA                       | Animal | Lyssavirus        |
| EU293121   | Rabies virus isolate 8743THA                       | Animal | Lyssavirus        |
| EU293114   | European bat lyssavirus 2 isolate 9018HOL          | Animal | Lyssavirus        |
| NC_009528  | European bat lyssavirus 2                          | Animal | Lyssavirus        |
| NC_001542  | Rabies virus                                       | Animal | Lyssavirus        |
| NC_006429  | Mokola virus                                       | Animal | Lyssavirus        |
| EU293117   | Mokola virus isolate 86100CAM                      | Animal | Lyssavirus        |
| EU293118   | Mokola virus isolate 86101RCA                      | Animal | Lyssavirus        |
| NC_009527  | European bat lyssavirus 1                          | Animal | Lyssavirus        |
| EF614260   | Irkut virus                                        | Animal | Lyssavirus        |
| EU293110   | Lagos bat virus isolate 8619NGA                    | Animal | Lyssavirus        |
| EU293108   | Lagos bat virus isolate 0406SEN                    | Animal | Lyssavirus        |
| NC_002526  | Bovine ephemeral fever virus                       | Animal | Ephemerovirus     |
